# Supplementary material
Source: PubMed Central journal article supplement (PMC4153415)

Figure S1

**A**

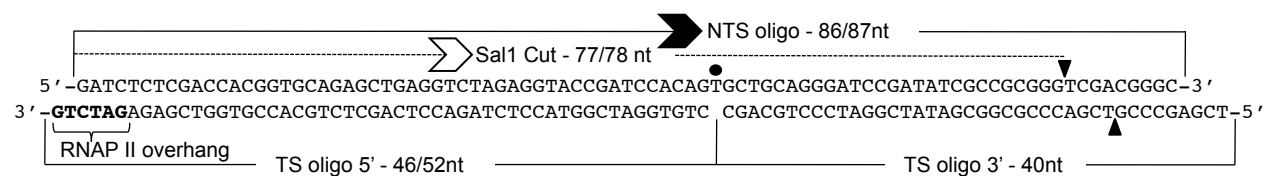

**B**

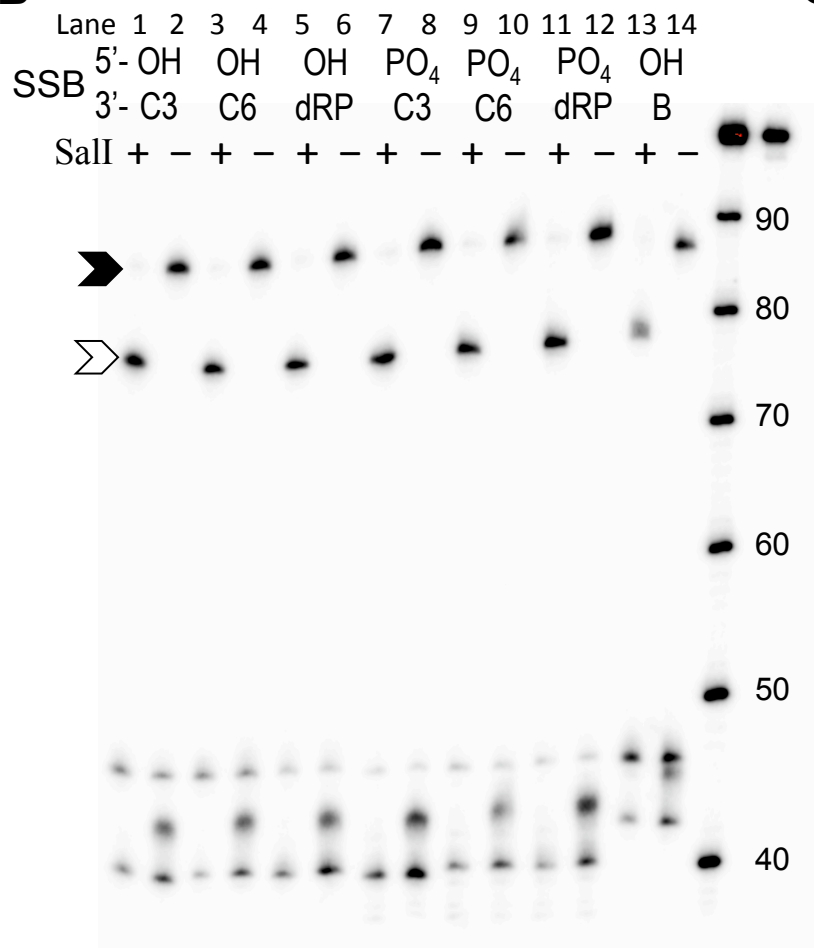

**C**

| SSB             |                 | SalI restriction % |     |        |     |
|-----------------|-----------------|--------------------|-----|--------|-----|
| 5'              | 3'              | T7RNAP             |     | RNAPII |     |
|                 |                 | 0nt                | 1nt | 0nt    | 1nt |
| Biotin          | OH              | 74                 | 75  | 93     | 97  |
|                 | Biotin          | 67                 | 75  | -      | -   |
| OH              | OH              | 92                 | 86  | 95     | 96  |
|                 | PO <sub>4</sub> | 83                 | 82  | -      | -   |
|                 | C3              | 97                 | 98  | 92     | 96  |
|                 | C6              | 98                 | 98  | 92     | 96  |
|                 | AP              | 97                 | 96  | -      | -   |
|                 | Biotin          | 98                 | 72  | 94     | 97  |
| PO <sub>4</sub> | PO <sub>4</sub> | 87                 | 83  | -      | -   |
|                 | C3              | 97                 | 98  | -      | -   |
|                 | C6              | 97                 | 96  | -      | -   |
|                 | AP              | 97                 | 95  | -      | -   |
|                 | Biotin          | 84                 | 75  | -      | -   |
| C3              | OH              | 98                 | 96  | 93     | 95  |

Figure S2

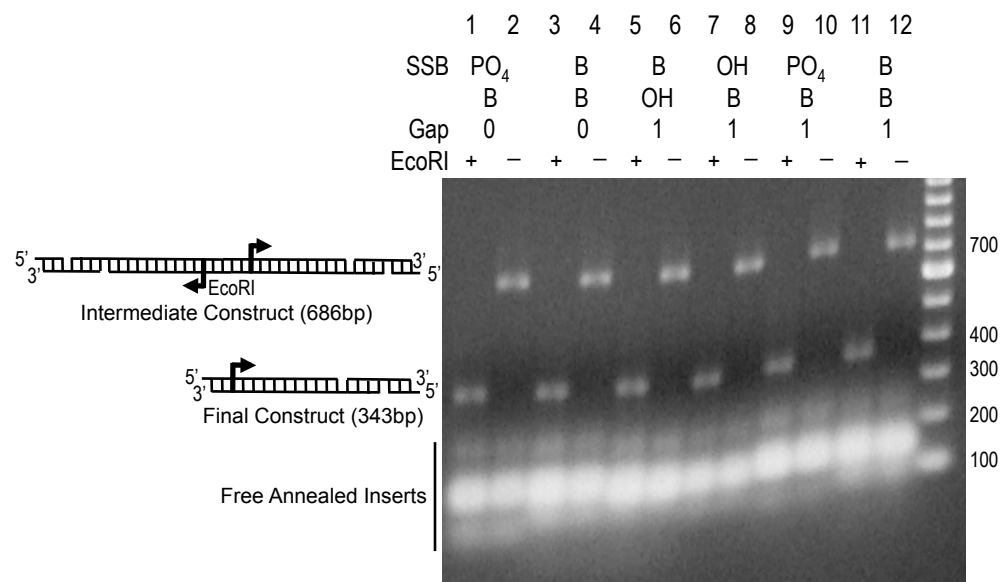

Figure S3

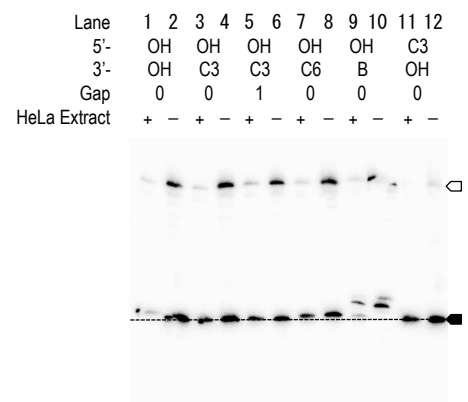

Supplement: NIHMS417533-supplement-2_si_002.pdf [file NIHMS417533-supplement-2_si_002.pdf]
